# Supplementary material for: Guiding Molecularly Imprinted Polymer Design by Pharmacophore Modeling
Source: Molecules. 2021 Aug 23;26(16):5101. doi: 10.3390/molecules26165101 (PMC8402217; doi:10.3390/molecules26165101)
Supplement: Supplementary file 1 [file molecules-26-05101-s001.zip › molecules-1334501-supplementary.pdf]

# Guiding molecularly imprinted polymer design by pharmacophore modeling

Wiebke Derz, Melita Fleischmann and Paul W. Elsinghorst

## 1. MISPE Development

### 1.1 Bulk Polymers

Initial MISPE experiments used bulk polymers imprinted by 1,4-dihydroxy-2-naphthoic acid following a published MISPE protocol for CIT [1]. As CIT could not be recovered under these conditions, first adaptations focused on elution as well as the total amount of polymer per cartridge. As shown in **Table S1**, switching from acidic to basic elution conditions (1–3% ammonia in methanol) provided acceptable recoveries, which could be further improved by a 25% reduction in polymer per cartridge.

**Table S1:** MISPE elution optimization using bulk polymers imprinted by 1,4-dihydroxy-2-naphthoic acid and 1 mL CIT (400 ng/mL in methanol/water, 70/30, *v/v*) (*n* = 6).

| ammonia in methanol (%) | polymer/cartridge (mg) | recovery (%) |
|-------------------------|------------------------|--------------|
| 1                       | 200                    | 81.2 ± 2.1   |
| 2                       | 200                    | 85.0 ± 3.3   |
| 3                       | 200                    | 84.8 ± 3.8   |
| 2                       | 150                    | 92.2 ± 2.2   |

Applying these modifications rice, rice crispies, wheat flour, pasta and oat matrix extracts were spiked to 2 mg/kg CIT and subjected to MISPE using MIP and NIP obtained from different surrogate templates (see also **Table A1**). The most promising surrogate from this screening (RHO) was subsequently used to optimize the washing step. Therefore, matrix extracts were subjected to MISPE using MIP imprinted by RHO and washed with different aqueous and organic solvents. Results were evaluated with respect to overall recovery and matrix removal as estimated by FLD noise in the range preceding CIT (**Table S2**). The most efficient clean-up was achieved when using methanol containing 1% acetic acid, although recoveries were lower than obtained when washing with water.

**Table S2:** MISPE washing optimization using spiked matrix extracts (400 ng/mL CIT), different aqueous and organic solvents and MIP imprinted by RHO (recovery as mean ± RSD, noise as mean ± SD, noise range: 6.15–7.35 min, *n* = 6).

| washing solvent | matrix        | recovery (%) | noise (LU)    |
|-----------------|---------------|--------------|---------------|
| water           | rice          | 84.9 ± 1.7   | 0.75 ± 0.01   |
|                 | rice crispies | 90.9 ± 2.8   | 1.1 ± 0.1     |
|                 | wheat flour   | 76.7 ± 12.3  | 0.031 ± 0.015 |
|                 | pasta         | 92.7 ± 3.3   | 0.19 ± 0.01   |
|                 | oats          | 84.0 ± 8.0   | 12.6 ± 0.8    |

| washing solvent                                               | matrix        | recovery (%) | noise (LU)    |
|---------------------------------------------------------------|---------------|--------------|---------------|
| 0.1% Tween 20 aq. followed by water                           | rice          | 67.4 ± 5.7   | 0.67 ± 0.04   |
|                                                               | rice crispies | 91.3 ± 5.7   | 1.6 ± 0.1     |
|                                                               | wheat flour   | 89.4 ± 6.8   | 0.037 ± 0.008 |
|                                                               | pasta         | 99.3 ± 1.2   | 0.19 ± 0.01   |
|                                                               | oats          | 97.4 ± 1.1   | 13.4 ± 0.3    |
| 0.1% Tween 20 in 10 mM orthophosphoric acid followed by water | rice          | 74.4 ± 3.1   | 0.78 ± 0.01   |
|                                                               | rice crispies | 100.1 ± 3.6  | 1.4 ± 0.1     |
|                                                               | wheat flour   | 77.7 ± 19.9  | 0.034 ± 0.003 |
|                                                               | pasta         | 99.2 ± 1.1   | 0.18 ± 0.01   |
|                                                               | oats          | 109.6 ± 0.9  | 11.0 ± 0.9    |
| methanol/water (1/1, v/v)                                     | rice          | 67.6 ± 1.4   | 0.75 ± 0.02   |
|                                                               | rice crispies | 73.4 ± 4.3   | 0.72 ± 0.08   |
|                                                               | wheat flour   | 54.8 ± 25.6  | 0.022 ± 0.004 |
|                                                               | pasta         | 95.6 ± 2.6   | 0.19 ± 0.01   |
|                                                               | oats          | 89.4 ± 4.7   | 11.1 ± 0.9    |
| methanol/water (1/1, v/v), 1% acetic acid                     | rice          | 85.2 ± 5.2   | 0.76 ± 0.04   |
|                                                               | rice crispies | 89.7 ± 0.4   | 0.92 ± 0.06   |
|                                                               | wheat flour   | 104.0 ± 6.0  | 0.025 ± 0.001 |
|                                                               | pasta         | 102.8 ± 1.9  | 0.19 ± 0.01   |
|                                                               | oats          | 108.5 ± 2.9  | 13.4 ± 1.0    |
| methanol                                                      | rice          | 65.4 ± 5.0   | 0.30 ± 0.06   |
|                                                               | rice crispies | 71.9 ± 2.9   | 0.40 ± 0.02   |
|                                                               | wheat flour   | 40.3 ± 20.7  | 0.023 ± 0.005 |
|                                                               | pasta         | 84.7 ± 3.0   | 0.10 ± 0.01   |
|                                                               | oats          | 101.6 ± 1.3  | 3.0 ± 0.5     |
| methanol, 1% acetic acid                                      | rice          | 57.4 ± 17.3  | 0.17 ± 0.04   |
|                                                               | rice crispies | 84.8 ± 3.7   | 0.38 ± 0.06   |
|                                                               | wheat flour   | 53.8 ± 11.7  | 0.018 ± 0.002 |
|                                                               | pasta         | 82.5 ± 1.9   | 0.06 ± 0.01   |
|                                                               | oats          | 107.4 ± 1.1  | 3.5 ± 0.9     |

In addition, different volumes of washing solvent were evaluated considering acidic methanol and water for comparison (**Table S3**). Oats as the most complex matrix (extracts spiked to 400 ng/mL CIT) were used for an initial screening in the range of 0.4–1.0 mL (for acidic methanol this range was extended to 2.0 mL, which however resulted already in a loss of analyte). As 1.0 mL instead of 0.8 mL acidic methanol did not provide less noise, but a slight loss in recovery, a final 0.8 mL wash step was applied for clean-up of the remaining matrices. As shown in **Table S3**, washing with 1% acetic acid in methanol again provided lower noise while recoveries remained around 90%.

**Table S3:** Wash volume optimization using spiked matrix extracts (400 ng/mL CIT) and MIP imprinted by RHO (recovery as mean  $\pm$  RSD, noise as mean  $\pm$  SD, noise range: 6.15–7.35 min,  $n = 6$ ).

| matrix        | washing solvent          | volume (mL) | recovery (%)   | noise (LU)        |
|---------------|--------------------------|-------------|----------------|-------------------|
| oats          | water                    | 0.4         | 87.1 $\pm$ 4.0 | 5.2 $\pm$ 0.5     |
|               |                          | 0.6         | 89.4 $\pm$ 2.6 | 5.4 $\pm$ 0.3     |
|               |                          | 0.8         | 92.8 $\pm$ 3.5 | 4.9 $\pm$ 0.6     |
|               |                          | 1.0         | 87.9 $\pm$ 2.3 | 5.3 $\pm$ 0.4     |
| oats          | methanol, 1% acetic acid | 0.4         | 92.7 $\pm$ 0.9 | 2.6 $\pm$ 0.2     |
|               |                          | 0.6         | 91.7 $\pm$ 2.0 | 1.8 $\pm$ 0.1     |
|               |                          | 0.8         | 93.5 $\pm$ 1.4 | 1.8 $\pm$ 0.2     |
|               |                          | 1.0         | 90.8 $\pm$ 1.0 | 1.1 $\pm$ 0.3     |
|               |                          | 2.0         | 81.3 $\pm$ 1.1 | 0.16 $\pm$ 0.016  |
| rice          | water                    | 0.8         | 78.4 $\pm$ 2.5 | 0.070 $\pm$ 0.011 |
|               | methanol, 1% acetic acid | 0.8         | 91.4 $\pm$ 1.7 | 0.036 $\pm$ 0.011 |
| rice crispies | water                    | 0.8         | 79.2 $\pm$ 1.6 | 0.52 $\pm$ 0.02   |
|               | methanol, 1% acetic acid | 0.8         | 92.7 $\pm$ 0.6 | 0.48 $\pm$ 0.13   |
| wheat flour   | water                    | 0.8         | 84.3 $\pm$ 1.5 | 0.099 $\pm$ 0.001 |
|               | methanol, 1% acetic acid | 0.8         | 89.8 $\pm$ 1.4 | 0.053 $\pm$ 0.005 |
| pasta         | water                    | 0.8         | 86.0 $\pm$ 5.1 | 0.27 $\pm$ 0.006  |
|               | methanol, 1% acetic acid | 0.8         | 91.6 $\pm$ 0.4 | 0.12 $\pm$ 0.007  |

### 1.2 Core-shell Polymers

To identify optimal polymerization conditions, different compositions of porogen (methanol, acetonitrile), cross-linker (TRIM, EGDMA) and functional monomers (DAEM, MAA, MAM) were used for core-shell polymer synthesis. The obtained polymers were subsequently analyzed for their size and general appearance using light microscopy (**Table S4**). In contrast to bulk polymerization, TRIM proved unsuitable as a cross-linker for core-shell polymerization as the obtained particles were too small for MISPE showing strong agglomeration. EGDMA as a cross-linker in combination with the functional monomer DAEM provided microspheres of narrow size dispersion, while methanol used as the porogen and to solubilize RHO led to improved particle formation.

**Table S4:** Compositions of porogen (methanol, acetonitrile), cross-linker (trimethylolpropane trimethacrylate, TRIM; ethylene glycol dimethacrylate, EGDMA) and functional monomers (*N,N*-dimethylaminoethyl methacrylate, DAEM; methacrylic acid, MAA; methacrylamide, MAM) for core-shell MIP imprinted by RHO. Microscopy (200 $\times$  magnification) was used to evaluate their suitability for MISPE cartridge packing in terms of size, form and behavior.

| porogen      | cross-linker | functional monomer | description/microscopy                                                                                                               |                                                                                       |
|--------------|--------------|--------------------|--------------------------------------------------------------------------------------------------------------------------------------|---------------------------------------------------------------------------------------|
| acetonitrile | EGDMA        | DAEM               | <ul style="list-style-type: none"> <li>- extremely fine particles</li> <li>- fluffy texture</li> <li>- bad handling</li> </ul>       | 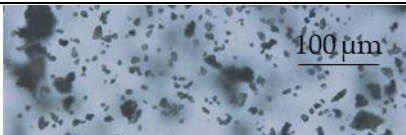 |
| methanol     | TRIM         | MAA                | <ul style="list-style-type: none"> <li>- uniformly sized particles</li> <li>- Ø approx. 20 μm</li> <li>- no agglomeration</li> </ul> | 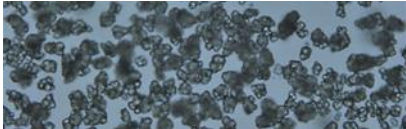 |

| porogen  | cross-linker | functional monomer | description/microscopy                                                    |                                                                                     |
|----------|--------------|--------------------|---------------------------------------------------------------------------|-------------------------------------------------------------------------------------|
| methanol | TRIM         | MAM                | - very fine particles,<br>- strong agglomeration                          | 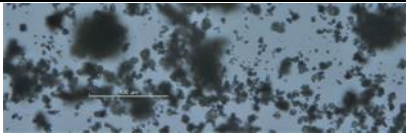 |
| methanol | EGDMA        | DAEM               | - uniformly sized particles<br>- Ø approx. 20 µm<br>- no agglomeration    | 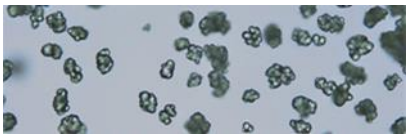 |
| methanol | EGDMA        | MAA                | - uniformly sized particles<br>- Ø approx. 10 µm<br>- agglomeration       | 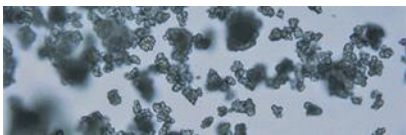 |
| methanol | EGDMA        | MAM                | - uniformly sized particles<br>- Ø approx. 5 µm<br>- strong agglomeration | 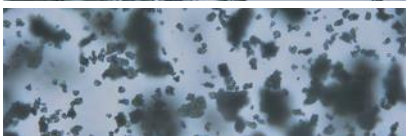 |

## 2. Citrinin stability

As research progressed doubts arose about the stability of CIT in those media used for MISPE and LC analysis (bulk polymers: 10 mM orthophosphoric acid/acetonitrile (80/20, *v/v*); core-shell polymers: methanol/water (50/50, *v/v*)). Neumann trend analysis of short-term stability experiments carried out over 12 hours revealed a significant degradation of CIT when stored in 10 mM orthophosphoric acid/acetonitrile (80/20, *v/v*), whereas storage in methanol/water (1/1, *v/v*) did not have a negative effect (**Figure S1**).

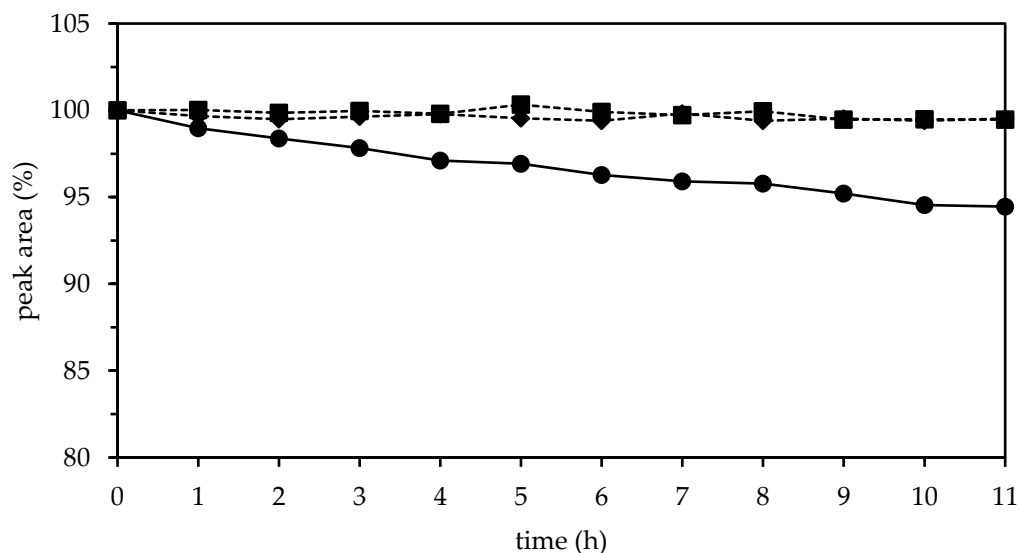

**Figure S1:** Short-term stability of CIT (●: 10 mM orthophosphoric acid/acetonitrile (80/20, *v/v*), -18 °C; ■: methanol/water (1/1, *v/v*), -18 °C; ◆: methanol/water (1/1, *v/v*), +4 °C).

Additional long-term stability tests of CIT/OTA mixtures using the LC thermostatic sampler (+18 °C) corroborated the instability of CIT in 10 mM orthophosphoric acid/acetonitrile (80/20, *v/v*) whereas OTA remained stable (**Figure S2**). Switching from bulk to core-shell polymers was therefore accompanied by a switch in reconstitution solution to methanol/water (1/1, *v/v*) and a lower evaporation temperature (40 °C).

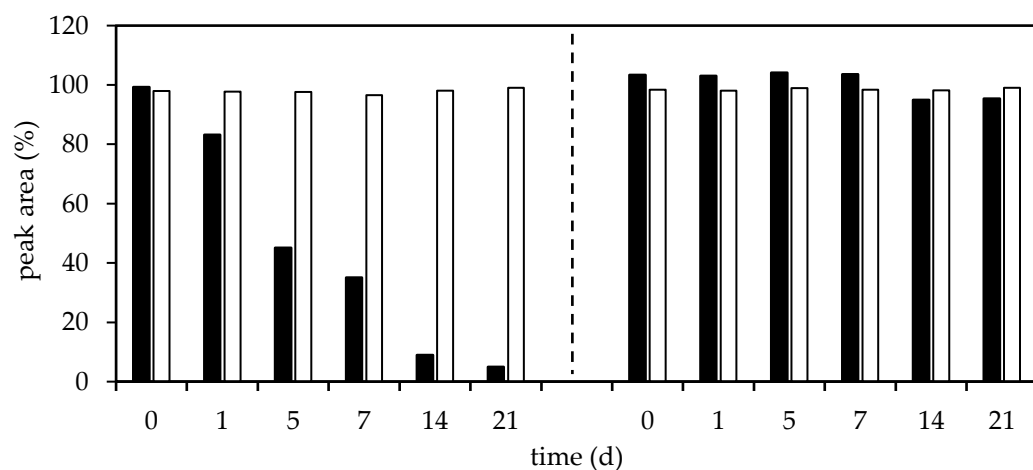

**Figure S2:** Long-term stability of CIT (■) and OTA (□) (left: 10 mM orthophosphoric acid/ acetonitrile (80/20, *v/v*); right: methanol/water (1/1, *v/v*)).

## References

1. Appell, M.; Jackson, M.A.; Wang, L.C.; Bosma, W.B. Determination of Citrinin Using Molecularly Imprinted Solid Phase Extraction Purification, HPLC Separation, and Fluorescence Detection. *J. Liq. Chromatogr. R. T.* **2015**, *38*, 1815–1819, doi:10.1080/10826076.2015.1113546.
